# Supplementary material for: Anschubfinanzierung für junge Wissenschaftler in der Universitätsmedizin in Deutschland
Source: Springer Nature journal article supplement (doi:10.1007/s00104-016-0300-4), 2016-10-12
Supplement: MOESM1 [file 10980864]

# Befragung zur Hochschulinternen Leistungsförderung (HILF)

## der Medizinischen Hochschule Hannover

### 1. Persönliche Angaben

|                                                                                            |                                                                     |
|--------------------------------------------------------------------------------------------|---------------------------------------------------------------------|
| Titel                                                                                      | <input type="text"/>                                                |
| Vorname                                                                                    | <input type="text"/>                                                |
| Nachname                                                                                   | <input type="text"/>                                                |
| Geschlecht                                                                                 | <input type="checkbox"/> weiblich <input type="checkbox"/> männlich |
| Nationalität                                                                               | <input type="text"/>                                                |
| Alter bei HILF-Projektbeginn                                                               | <input type="text"/>                                                |
| OE der MHH-Abteilung, bei der Sie zum Zeitpunkt der HILF-Antragsstellung beschäftigt waren | <input type="text"/>                                                |

### 1a. Derzeitiger Arbeitgeber

|                                                                                                                                    |                                                  |                      |
|------------------------------------------------------------------------------------------------------------------------------------|--------------------------------------------------|----------------------|
| <input type="checkbox"/> weiterhin an der MHH beschäftigt                                                                          | falls zutreffend, OE Ihrer derzeitigen Abteilung | <input type="text"/> |
| <input type="checkbox"/> andere akademische Einrichtung,<br>z.B. Universität, Max-Planck-Institut,<br>Fraunhofer Gesellschaft u.ä. | falls zutreffend, Name des Arbeitgebers          | <input type="text"/> |
| <input type="checkbox"/> nichtakademischer Arbeitgeber                                                                             | falls zutreffend, Name des Arbeitgebers          | <input type="text"/> |

### 2. vor HILF-Antragsstellung

|                                                                                                           |                                                           |
|-----------------------------------------------------------------------------------------------------------|-----------------------------------------------------------|
| Haben Sie Ihren HILF-Antrag nach einem oder mehreren beruflich begründeten Auslandsaufenthalten gestellt? | <input type="checkbox"/> ja <input type="checkbox"/> nein |
| wenn ja, Institution/Ort                                                                                  | <input type="text"/>                                      |
| Land                                                                                                      | <input type="text"/>                                      |

Anmerkung: Gingen der HILF-Antragsstellung mehrere Auslandsaufenthalte voraus, nennen Sie bitte Institution/Ort und Land des letzten Aufenthalts.

### 3. Förderungen nach HILF

Wurden basierend auf HILF weitere Drittmittel bewilligt?

bei DFG

☐ ja

☐ nein

wenn ja,  
DFG-  
Projekttitel

bei Stiftungen

☐ ja

☐ nein

wenn ja, Name  
der Stiftung

Stiftungs-  
Projekttitel

bei  
sonstigen  
Förderern

☐ ja

☐ nein

wenn ja,  
Name des  
Förderers

Höhe der Drittmittelförderung

Euro

### 4. Publikationen

Anzahl der aus dem HILF-Projekt hervorgegangenen Publikationen

Bitte führen Sie im folgenden Abschnitt 4a (diese Seite unten und Fortsetzung nächste Seite) alle Publikationen auf. Wurde nicht publiziert, tragen Sie bei Anzahl "0" ein und lassen den kompletten Abschnitt 4a frei.

#### 4a. Einzelaufstellung der Publikationen

##### Publikation 1

Journal

Jahr der Veröffentlichung

Titel

Autoren

##### Publikation 2

Journal

Jahr der Veröffentlichung

Titel

Autoren

#### 4a. Einzelaufstellung der Publikationen (Fortsetzung)

##### Publikation 3

Journal

Jahr der Veröffentlichung

Titel

Autoren

##### Publikation 4

Journal

Jahr der Veröffentlichung

Titel

Autoren

##### Publikation 5

Journal

Jahr der Veröffentlichung

Titel

Autoren

##### Publikation 6

Journal

Jahr der Veröffentlichung

Titel

Autoren

## 5. Patente

Anzahl der aus dem HILF-Projekt hervorgegangenen Patentanmeldungen

Bitte führen Sie die Titel aller Patente getrennt durch Kommata auf. Wurden keine Patente angemeldet, tragen Sie bei Anzahl "0" ein und lassen das folgende Feld frei.

## 6. Tagungsbeiträge

Anzahl der aktiven Beiträge (Vorträge/Poster/sonstiges) über das HILF-Projekt auf Kongressen, Tagungen etc.

Bitte führen Sie im folgenden Abschnitt 6a alle Tagungsbeiträge auf. Wurden keine Tagungsbeiträge gehalten, tragen Sie bei Anzahl "0" ein und lassen den kompletten Abschnitt 6a frei.

### 6a. Einzelaufstellung der Tagungsbeiträge

#### Tagungsbeitrag 1

Veranstaltung  
z.B. Name des Kongresses

Art des Beitrags

☐

Vortrag

☐

Poster

☐

sonstiges

Titel des Beitrags

#### Tagungsbeitrag 2

Veranstaltung  
z.B. Name des Kongresses

Art des Beitrags

☐

Vortrag

☐

Poster

☐

sonstiges

Titel des Beitrags

#### Tagungsbeitrag 3

Veranstaltung  
z.B. Name des Kongresses

Art des Beitrags

☐

Vortrag

☐

Poster

☐

sonstiges

Titel des Beitrags

#### Tagungsbeitrag 4

Veranstaltung  
z.B. Name des Kongresses

Art des Beitrags

☐

Vortrag

☐

Poster

☐

sonstiges

Titel des Beitrags

## 7. wissenschaftliche Auszeichnungen

Gab es mit dem Projekt verbundene wissenschaftliche Auszeichnungen?

☐ ja

☐ nein

Wenn ja, führen Sie bitte in Abschnitt 7a alle Auszeichnungen auf.

### 7a. Einzelaufstellung der wissenschaftlichen Auszeichnungen

#### Auszeichnung 1

Bezeichnung

#### Auszeichnung 2

Bezeichnung

#### Auszeichnung 3

Bezeichnung

#### Auszeichnung 4

Bezeichnung

#### Auszeichnung 5

Bezeichnung

## 8. abschließende Fragen

Spielte das geförderte Forschungsprojekt eine Rolle bei Ihrer Habilitation?

☐ ja

☐ nein

Waren weitere Abteilungen der MHH maßgeblich an der Durchführung des HILF-Projektes beteiligt?

☐ ja

☐ nein

Wenn ja, führen Sie bitte die OEs dieser Abteilungen und den Namen Ihres Kooperationspartners auf.

#### Abteilung 1

OE

Name des Kooperationspartners

#### Abteilung 2

OE

Name des Kooperationspartners

#### Abteilung 3

OE

Name des Kooperationspartners

#### Abteilung 4

OE

Name des Kooperationspartners

#### Abteilung 5

OE

Name des Kooperationspartners

## 8. abschließende Fragen (Fortsetzung)

Waren Doktoranden in das HILF-Projekt eingebunden?

☐ ja

☐ nein

Haben Sie abschließend noch Änderungsvorschläge oder Wünsche an HILF?

Vielen Dank für Ihre Angaben. Bitte scannen Sie den ausgefüllten Fragebogen ein und schicken das Dokument per E-Mail an:

[linke.petra@mh-hannover.de](mailto:linke.petra@mh-hannover.de)
